# Supplementary material for: A medium-entropy garnet-type oxide as a solid electrolyte with enhanced air stability for Li-ion batteries
Source: Royal Society of Chemistry journal article supplement (doi:10.1039/d4ta07630c), 2025-01-01
Supplement: d4ta07630c1.pdf [file d4ta07630c1.pdf]

## Supporting information

**Table S1.** Benchmark of LLZO with different dopant

| Composition                                                                                                        | Syntheses Process     | Sintering Parameter | Ionic conductivity $\times 10^{-4}$ (S/cm) | Activation energy (eV) | Ref. |
|--------------------------------------------------------------------------------------------------------------------|-----------------------|---------------------|--------------------------------------------|------------------------|------|
| $\text{Li}_7\text{La}_3\text{Zr}_2\text{O}_{12}$                                                                   | Solid phase sintering | 1473 K for 12 h     | 0.17                                       | 0.47                   | [1]  |
| $\text{Li}_{6.4}\text{La}_3\text{Zr}_{1.4}\text{Ta}_{0.6}\text{O}_{12}$                                            | Solid phase sintering | 1413 K for 12 h     | 10                                         | 0.35                   | [2]  |
| $\text{Li}_{6.4}\text{La}_3\text{Zr}_{1.6}\text{Nb}_{0.4}\text{O}_{12}$                                            | Solid phase sintering | 1423 K for 1 h      | 3.49                                       | 0.32                   | [3]  |
| $\text{Li}_{6.76}\text{La}_3\text{Zr}_{1.875}\text{Te}_{0.125}\text{O}_{12}$                                       | Solid phase sintering | 1373 K for 15 h     | 3.3                                        | 0.25                   | [4]  |
| $\text{Li}_{6.3}\text{La}_3\text{Zr}_{1.65}\text{W}_{0.35}\text{O}_{12}$                                           | Solid phase sintering | 1473 K for 12 h     | 6.4                                        | 0.43                   | [1]  |
| $\text{Li}_7\text{La}_3\text{Zr}_1\text{Nb}_{0.5}\text{Y}_{0.5}\text{O}_{12}$                                      | Solid phase sintering | 1503 K for 15 h     | 8.29                                       | 0.31                   | [5]  |
| $\text{Li}_{6.925}\text{La}_{2.95}\text{Y}_{0.05}\text{Zr}_{1.925}\text{Sb}_{0.075}\text{O}_{12}$                  | Solid phase sintering | 1463 K for 6 h      | 3.2                                        | 0.30                   | [6]  |
| $\text{Li}_7\text{La}_3\text{Zr}_{0.5}\text{Nb}_{0.5}\text{Ta}_{0.5}\text{Hf}_{0.5}\text{O}_{12}$                  | Solid phase sintering | 1373 K for 20 h     | 4.67                                       | 0.25                   | [7]  |
| $\text{Li}_{6.4}\text{La}_3\text{Zr}_{0.4}\text{Ta}_{0.4}\text{Nb}_{0.4}\text{Y}_{0.6}\text{W}_{0.2}\text{O}_{12}$ | Solid-state           | 1323 K for 36 h     | 1.16                                       | 0.23                   | [8]  |

## Construction of computing crystal structure

The pure LLZO cubic bulk structure was constructed with a space group of  $Ia\bar{3}d$  and a primitive unit cell formula  $\text{Li}_{28}\text{La}_{12}\text{Zr}_8\text{O}_{48}$ . Transition metal (TM) ions  $\text{Ta}^{5+}$ ,  $\text{Nb}^{5+}$  and  $\text{Y}^{3+}$  were equally 2 cation occupied at the Zr sites based on EXAFS data that show these cations share the same environment, which indicating the original 8  $\text{Zr}^{4+}$  cations were partially substituted by these cations. A primitive cell with 94 atoms and a stoichiometric formula of  $\text{Li}_{26}\text{La}_{12}\text{Zr}_2\text{Ta}_2\text{Nb}_2\text{Y}_2\text{O}_{48}$  was constructed. Li ions were distributed to minimize  $\text{Li}^+/\text{Li}^+$  repulsion forces, following the rule proposed by O'Callaghan *et al.* [9], generating the most stable garnet structure. We select 2 different lithium ion by-rule distribution scenario, and random distribution of TM ions at the Zr sites was examined, totally 12 different distributed TM ions structures were conducted (**Figure S1**), and the most stable structure was selected for further calculations. The maximum energy variation in  $\text{Li}_{26}\text{La}_{12}\text{Zr}_2\text{Ta}_2\text{Nb}_2\text{Y}_2\text{O}_{48}$  lattice among these distributions was 0.957 eV as shown in **Figure S2**. The lattice constant after optimization differed by less than 1% from experimental values, demonstrating the model is reliable (**Table S2**).

Hydration reactions were observed in the LLZO system in the presence of water molecules. Hydrogen from water tends to react with lithium ions in the material, forming LiOH in previous literature. [10] According to calculations, both pure LLZO and doped LLZTNYO, hydrogen preferably occupied the 96h site over the 24d site, where 96h and 24d sites indicated the lithium-ion Wyckoff position of the lattice (**Figure S3**). Various Li ion occupation scenarios were tested to determine the most stable configuration for further calculations.

### The Kroger-Vink notation equation:

Increase lithium vacancies concentration

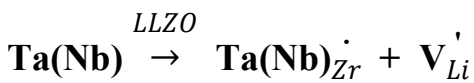

Increase lithium-ion concentration

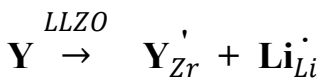

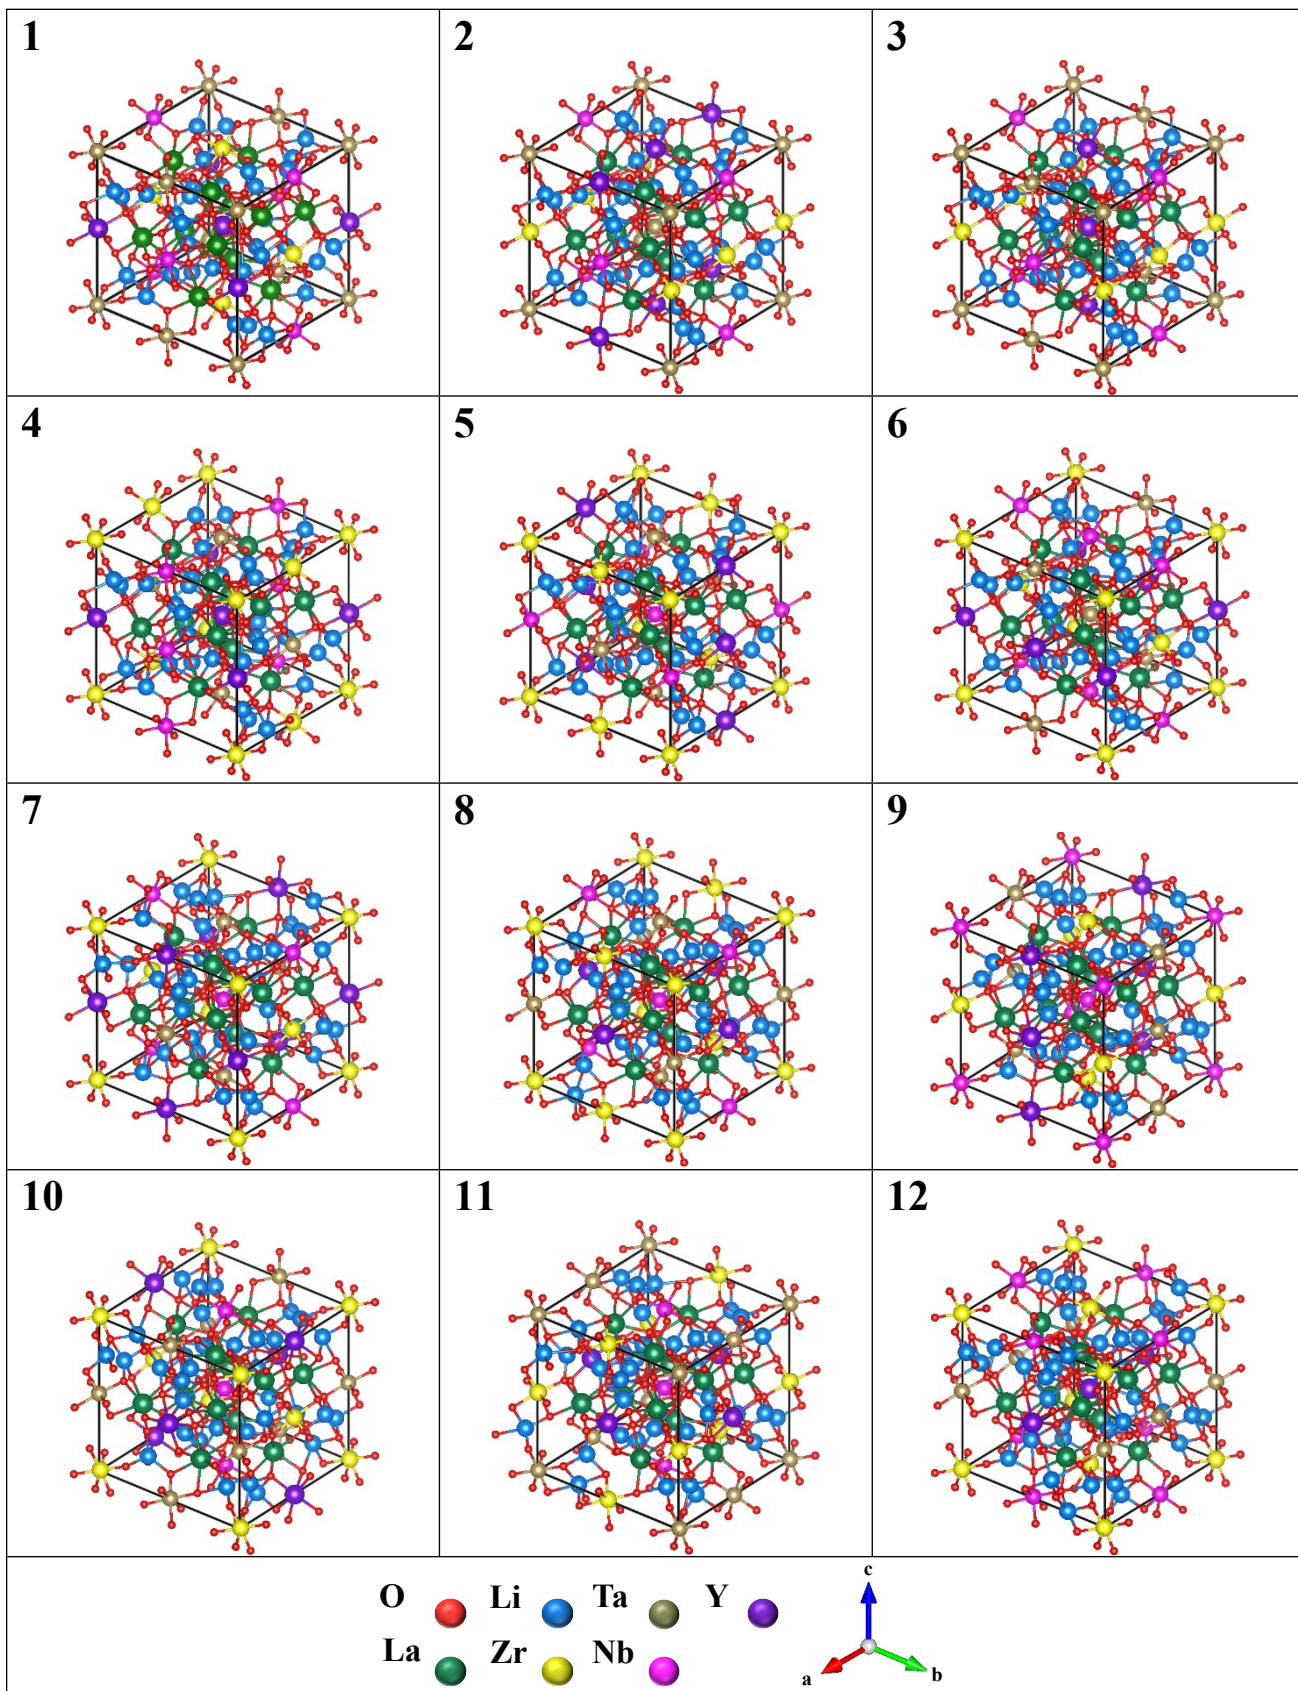

**Figure S1.** Different LLZTNYO model with different ion distribution

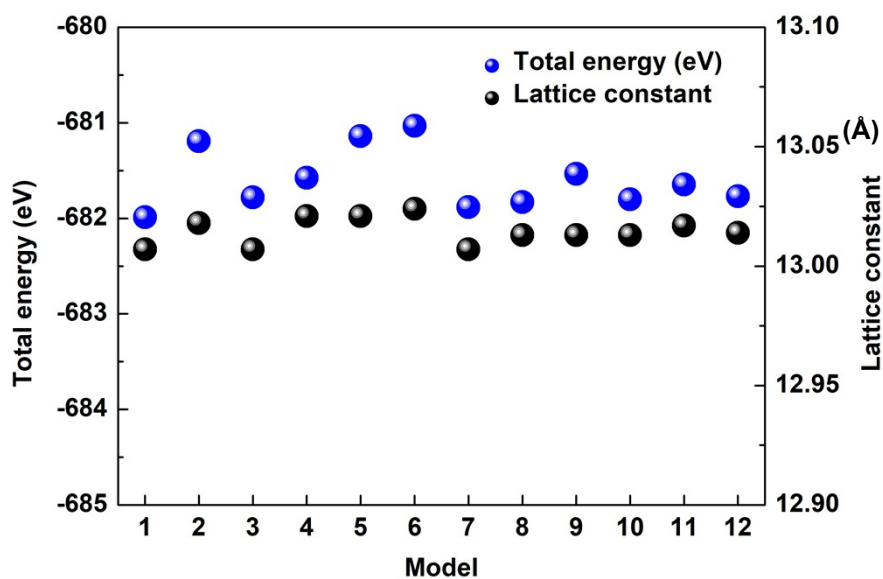

**Figure S2.** Different TM distribution sample's total energy and their lattice constant

**Table S2.** Lattice constant of our model compared to previous literature and experiment result.

|                      | $\text{Li}_7\text{La}_3\text{Zr}_2\text{O}_{12}$ |          | $\text{Li}_{6.5}\text{La}_3\text{Zr}_{0.5}\text{Ta}_{0.5}\text{Nb}_{0.5}\text{Y}_{0.5}\text{O}_1$ |          |
|----------------------|--------------------------------------------------|----------|---------------------------------------------------------------------------------------------------|----------|
|                      | Exp                                              | DFT      | Exp                                                                                               | DFT      |
| Lattice constant (Å) | 13.004                                           | 12.988   | 12.934                                                                                            | 13.013   |
| $\Delta L$ (%)       | 0                                                | 0.123    | 0                                                                                                 | -0.611   |
| Ref                  | Ref <sup>[11]</sup>                              | DFT work | Exp work                                                                                          | DFT work |

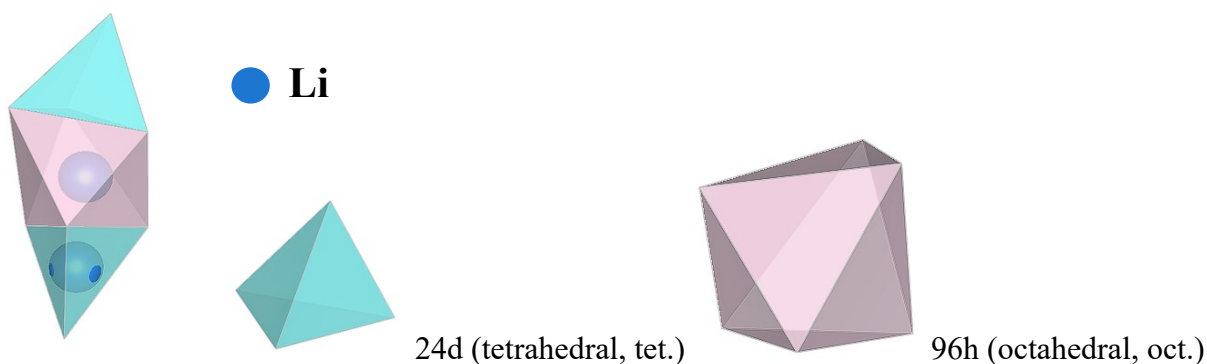

**Figure S3.** Structure of 24d and 96h Wyckoff positions

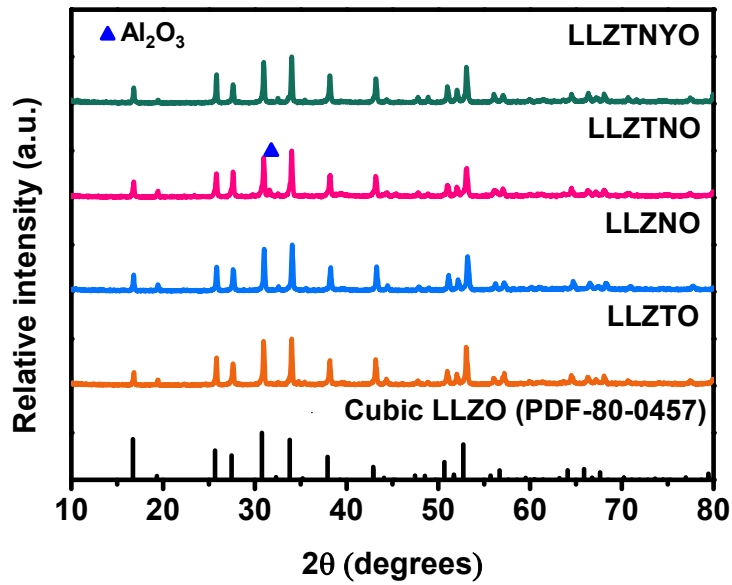

**Figure S4.** XRD patterns of Cubic LLZO,  $\text{Li}_{6.5}\text{La}_3\text{Zr}_{1.5}\text{Ta}_{0.5}\text{O}_{12}$  (LLZTO),  $\text{Li}_{6.5}\text{La}_3\text{Zr}_{1.5}\text{Nb}_{0.5}\text{O}_{12}$  (LLZNO),  $\text{Li}_{6.5}\text{La}_3\text{Zr}_1\text{Ta}_{0.5}\text{Nb}_{0.5}\text{O}_{12}$  (LLZTNO), and  $\text{Li}_{6.5}\text{La}_3\text{Zr}_{0.5}\text{Ta}_{0.5}\text{Nb}_{0.5}\text{Y}_{0.5}\text{O}_{12}$  (LLZTNYWO)

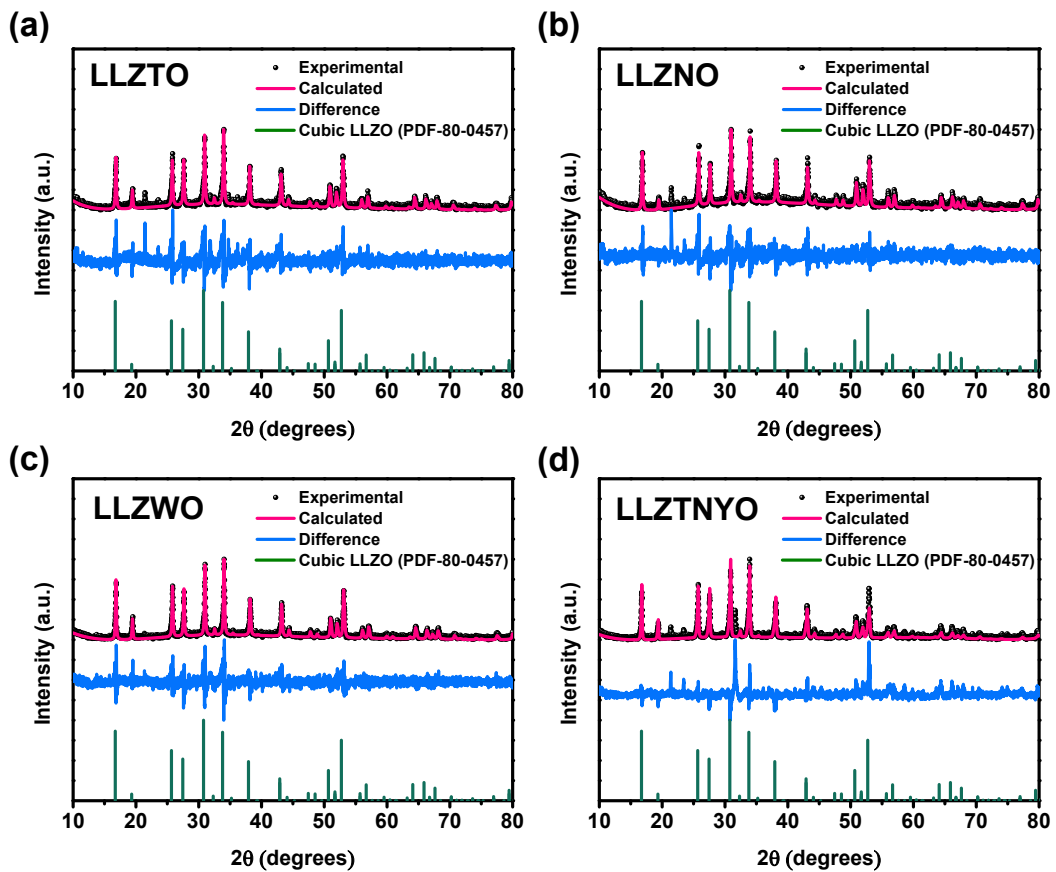

**Figure S5.** Refinement data of Cubic LLZO, (a)  $\text{Li}_{6.5}\text{La}_3\text{Zr}_{1.5}\text{Ta}_{0.5}\text{O}_{12}$  (LLZTO), (b)  $\text{Li}_{6.5}\text{La}_3\text{Zr}_{1.5}\text{Nb}_{0.5}\text{O}_{12}$  (LLZNO), (c)  $\text{Li}_6\text{La}_3\text{ZrTa}_{0.5}\text{Nb}_{0.5}\text{O}_{12}$  (LLZTNO), and (d)  $\text{Li}_{6.5}\text{La}_3\text{Zr}_{0.5}\text{Ta}_{0.5}\text{Nb}_{0.5}\text{Y}_{0.5}\text{O}_{12}$  (LLZTNYO)

**Table S3.** XRD Rietveld refinement parameters of LLZTO, LLZNO, LLZTNO, and LLZTNYO

| Composition | Lattice parameter (Å) | Rwp   | GOF  |
|-------------|-----------------------|-------|------|
| LLZTO       | 12.925                | 13.78 | 1.33 |
| LLZNO       | 12.922                | 13.34 | 1.24 |
| LLZTNO      | 12.905                | 11.29 | 1.18 |
| LLZTNYO     | 12.934                | 16.39 | 1.7  |

**Table S4.** Structural solution of LLZTNYO from Rietveld refinement on neutron diffraction data.

| Space group: "I a -3 d", a = 13.02796 Å, $\alpha = 90^\circ$ , V = 2211.208 Å <sup>3</sup> , Rwp = 5.298% |              |          |          |         |          |                        |
|-----------------------------------------------------------------------------------------------------------|--------------|----------|----------|---------|----------|------------------------|
| Atom                                                                                                      | multiplicity | x        | y        | z       | fraction | Uiso (Å <sup>2</sup> ) |
| La                                                                                                        | 24           | 0.125    | 0        | 0.25    | 1        | 0.0165                 |
| Nb                                                                                                        | 16           | 0        | 0        | 0       | 0.25     | 0.0161                 |
| Ta                                                                                                        | 16           | 0        | 0        | 0       | 0.25     | 0.0161                 |
| Y                                                                                                         | 16           | 0        | 0        | 0       | 0.25     | 0.0161                 |
| Zr                                                                                                        | 16           | 0        | 0        | 0       | 0.25     | 0.0161                 |
| Li                                                                                                        | 24           | 0.375    | 0        | 0.25    | 0.53     | 0.027                  |
| Li                                                                                                        | 96           | 0.098858 | 0.188941 | 0.42926 | 0.41     | 0.027                  |
| O                                                                                                         | 96           | 0.10228  | 0.19745  | 0.27925 | 1        | 0.0226                 |

**Table S5.** Structural solution of LLZTNYO from neutron PDF fitting.

| Space group = P1, a = b = c 12.957 Å, $\alpha = \beta = \gamma = 90^\circ$ ,<br>Rwp = 25.82% |           |       |       |           |
|----------------------------------------------------------------------------------------------|-----------|-------|-------|-----------|
| Atom                                                                                         | Positions |       |       | Occupancy |
| La                                                                                           | 0.125     | 0     | 0.25  | 1         |
| La                                                                                           | 0.25      | 0.875 | 0.5   | 1         |
| La                                                                                           | 0.375     | 0     | 0.75  | 1         |
| La                                                                                           | 0.25      | 0.125 | 0     | 1         |
| La                                                                                           | 0.5       | 0.25  | 0.875 | 1         |
| La                                                                                           | 0.75      | 0.375 | 0     | 1         |
| La                                                                                           | 0         | 0.25  | 0.125 | 1         |
| La                                                                                           | 0.875     | 0.5   | 0.25  | 1         |
| La                                                                                           | 0         | 0.75  | 0.375 | 1         |
| La                                                                                           | 0.875     | 0     | 0.75  | 1         |
| La                                                                                           | 0.75      | 0.125 | 0.5   | 1         |
| La                                                                                           | 0.625     | 0     | 0.25  | 1         |
| La                                                                                           | 0.75      | 0.875 | 0     | 1         |
| La                                                                                           | 0.5       | 0.75  | 0.125 | 1         |
| La                                                                                           | 0.25      | 0.625 | 0     | 1         |
| La                                                                                           | 0         | 0.75  | 0.875 | 1         |
| La                                                                                           | 0.125     | 0.5   | 0.75  | 1         |
| La                                                                                           | 0         | 0.25  | 0.625 | 1         |
| La                                                                                           | 0.625     | 0.5   | 0.75  | 1         |
| La                                                                                           | 0.75      | 0.625 | 0.5   | 1         |
| La                                                                                           | 0.5       | 0.75  | 0.625 | 1         |
| La                                                                                           | 0.375     | 0.5   | 0.25  | 1         |
| La                                                                                           | 0.25      | 0.375 | 0.5   | 1         |
| La                                                                                           | 0.5       | 0.25  | 0.375 | 1         |
| Li                                                                                           | 0.375     | 0     | 0.25  | 0.53      |
| Li                                                                                           | 0.25      | 0.125 | 0.5   | 0.53      |
| Li                                                                                           | 0.125     | 0     | 0.75  | 0.53      |
| Li                                                                                           | 0.25      | 0.875 | 0     | 0.53      |
| Li                                                                                           | 0.25      | 0.375 | 0     | 0.53      |
| Li                                                                                           | 0.5       | 0.25  | 0.125 | 0.53      |
| Li                                                                                           | 0.75      | 0.125 | 0     | 0.53      |
| Li                                                                                           | 0         | 0.25  | 0.875 | 0.53      |
| Li                                                                                           | 0.875     | 0     | 0.25  | 0.53      |
| Li                                                                                           | 0         | 0.25  | 0.375 | 0.53      |
| Li                                                                                           | 0.125     | 0.5   | 0.25  | 0.53      |
| Li                                                                                           | 0         | 0.75  | 0.125 | 0.53      |
| Li                                                                                           | 0.625     | 0     | 0.75  | 0.53      |
| Li                                                                                           | 0.75      | 0.875 | 0.5   | 0.53      |
| Li                                                                                           | 0.75      | 0.625 | 0     | 0.53      |
| Li                                                                                           | 0.5       | 0.75  | 0.875 | 0.53      |
| Li                                                                                           | 0         | 0.75  | 0.625 | 0.53      |
| Li                                                                                           | 0.875     | 0.5   | 0.75  | 0.53      |



|    |         |         |         |       |
|----|---------|---------|---------|-------|
| Li | 0.625   | 0.5     | 0.25    | 0.53  |
| Li | 0.75    | 0.375   | 0.5     | 0.53  |
| Li | 0.25    | 0.625   | 0.5     | 0.53  |
| Li | 0.5     | 0.75    | 0.375   | 0.53  |
| Li | 0.375   | 0.5     | 0.75    | 0.53  |
| Li | 0.5     | 0.25    | 0.625   | 0.53  |
| Li | 0.125   | 0.17849 | 0.42849 | 0.414 |
| Li | 0.07152 | 0.875   | 0.67849 | 0.414 |
| Li | 0.375   | 0.82151 | 0.92849 | 0.414 |
| Li | 0.42849 | 0.125   | 0.17849 | 0.414 |
| Li | 0.125   | 0.82151 | 0.07152 | 0.414 |
| Li | 0.07152 | 0.125   | 0.82151 | 0.414 |
| Li | 0.375   | 0.17849 | 0.57151 | 0.414 |
| Li | 0.42849 | 0.875   | 0.32152 | 0.414 |
| Li | 0.67849 | 0.07152 | 0.875   | 0.414 |
| Li | 0.92849 | 0.375   | 0.82151 | 0.414 |
| Li | 0.17849 | 0.42849 | 0.125   | 0.414 |
| Li | 0.82151 | 0.07152 | 0.125   | 0.414 |
| Li | 0.57151 | 0.375   | 0.17849 | 0.414 |
| Li | 0.32152 | 0.42849 | 0.875   | 0.414 |
| Li | 0.875   | 0.67849 | 0.07152 | 0.414 |
| Li | 0.82151 | 0.92849 | 0.375   | 0.414 |
| Li | 0.17849 | 0.57151 | 0.375   | 0.414 |
| Li | 0.875   | 0.32152 | 0.42849 | 0.414 |
| Li | 0.875   | 0.82151 | 0.57151 | 0.414 |
| Li | 0.92849 | 0.125   | 0.32152 | 0.414 |
| Li | 0.625   | 0.17849 | 0.07152 | 0.414 |
| Li | 0.57151 | 0.875   | 0.82151 | 0.414 |
| Li | 0.875   | 0.17849 | 0.92849 | 0.414 |
| Li | 0.92849 | 0.875   | 0.17849 | 0.414 |
| Li | 0.625   | 0.82151 | 0.42849 | 0.414 |
| Li | 0.57151 | 0.125   | 0.67849 | 0.414 |
| Li | 0.32152 | 0.92849 | 0.125   | 0.414 |
| Li | 0.07152 | 0.625   | 0.17849 | 0.414 |
| Li | 0.82151 | 0.57151 | 0.875   | 0.414 |
| Li | 0.17849 | 0.92849 | 0.875   | 0.414 |
| Li | 0.42849 | 0.625   | 0.82151 | 0.414 |
| Li | 0.67849 | 0.57151 | 0.125   | 0.414 |
| Li | 0.125   | 0.32152 | 0.92849 | 0.414 |
| Li | 0.17849 | 0.07152 | 0.625   | 0.414 |
| Li | 0.82151 | 0.42849 | 0.625   | 0.414 |
| Li | 0.125   | 0.67849 | 0.57151 | 0.414 |
| Li | 0.625   | 0.67849 | 0.92849 | 0.414 |
| Li | 0.92849 | 0.625   | 0.67849 | 0.414 |
| Li | 0.625   | 0.32152 | 0.57151 | 0.414 |
| Li | 0.57151 | 0.625   | 0.32152 | 0.414 |
| Li | 0.67849 | 0.92849 | 0.625   | 0.414 |

|    |         |         |         |       |
|----|---------|---------|---------|-------|
| Li | 0.32152 | 0.57151 | 0.625   | 0.414 |
| Li | 0.375   | 0.32152 | 0.07152 | 0.414 |
| Li | 0.07152 | 0.375   | 0.32152 | 0.414 |
| Li | 0.375   | 0.67849 | 0.42849 | 0.414 |
| Li | 0.42849 | 0.375   | 0.67849 | 0.414 |
| Li | 0.32152 | 0.07152 | 0.375   | 0.414 |
| Li | 0.67849 | 0.42849 | 0.375   | 0.414 |
| Y  | 0       | 0       | 0       | 1     |
| Nb | 0.25    | 0.75    | 0.25    | 1     |
| Y  | 0.5     | 0       | 0.5     | 1     |
| Nb | 0.25    | 0.25    | 0.75    | 1     |
| Zr | 0       | 0       | 0.5     | 1     |
| Nb | 0.25    | 0.25    | 0.25    | 1     |
| Zr | 0.5     | 0       | 0       | 1     |
| Nb | 0.25    | 0.75    | 0.75    | 1     |
| Y  | 0.5     | 0.5     | 0       | 1     |
| Nb | 0.75    | 0.25    | 0.25    | 1     |
| Zr | 0       | 0.5     | 0       | 1     |
| Nb | 0.75    | 0.25    | 0.75    | 1     |
| Y  | 0       | 0.5     | 0.5     | 1     |
| Nb | 0.75    | 0.75    | 0.25    | 1     |
| Nb | 0.75    | 0.75    | 0.75    | 1     |
| Zr | 0.5     | 0.5     | 0.5     | 1     |
| O  | 0.10085 | 0.19759 | 0.28076 | 1     |
| O  | 0.05241 | 0.85085 | 0.53076 | 1     |
| O  | 0.39915 | 0.80241 | 0.78076 | 1     |
| O  | 0.44759 | 0.14915 | 0.03076 | 1     |
| O  | 0.10085 | 0.80241 | 0.21924 | 1     |
| O  | 0.05241 | 0.14915 | 0.96924 | 1     |
| O  | 0.39915 | 0.19759 | 0.71924 | 1     |
| O  | 0.44759 | 0.85085 | 0.46924 | 1     |
| O  | 0.28076 | 0.10085 | 0.19759 | 1     |
| O  | 0.53076 | 0.05241 | 0.85085 | 1     |
| O  | 0.78076 | 0.39915 | 0.80241 | 1     |
| O  | 0.03076 | 0.44759 | 0.14915 | 1     |
| O  | 0.21924 | 0.10085 | 0.80241 | 1     |
| O  | 0.96924 | 0.05241 | 0.14915 | 1     |
| O  | 0.71924 | 0.39915 | 0.19759 | 1     |
| O  | 0.46924 | 0.44759 | 0.85085 | 1     |
| O  | 0.14915 | 0.03076 | 0.44759 | 1     |
| O  | 0.19759 | 0.28076 | 0.10085 | 1     |
| O  | 0.85085 | 0.53076 | 0.05241 | 1     |
| O  | 0.80241 | 0.78076 | 0.39915 | 1     |
| O  | 0.14915 | 0.96924 | 0.05241 | 1     |
| O  | 0.19759 | 0.71924 | 0.39915 | 1     |
| O  | 0.85085 | 0.46924 | 0.44759 | 1     |
| O  | 0.80241 | 0.21924 | 0.10085 | 1     |

|   |         |         |         |   |
|---|---------|---------|---------|---|
| O | 0.89915 | 0.80241 | 0.71924 | 1 |
| O | 0.94759 | 0.14915 | 0.46924 | 1 |
| O | 0.60085 | 0.19759 | 0.21924 | 1 |
| O | 0.55241 | 0.85085 | 0.96924 | 1 |
| O | 0.89915 | 0.19759 | 0.78076 | 1 |
| O | 0.94759 | 0.85085 | 0.03076 | 1 |
| O | 0.60085 | 0.80241 | 0.28076 | 1 |
| O | 0.55241 | 0.14915 | 0.53076 | 1 |
| O | 0.71924 | 0.89915 | 0.80241 | 1 |
| O | 0.46924 | 0.94759 | 0.14915 | 1 |
| O | 0.21924 | 0.60085 | 0.19759 | 1 |
| O | 0.96924 | 0.55241 | 0.85085 | 1 |
| O | 0.78076 | 0.89915 | 0.19759 | 1 |
| O | 0.03076 | 0.94759 | 0.85085 | 1 |
| O | 0.28076 | 0.60085 | 0.80241 | 1 |
| O | 0.53076 | 0.55241 | 0.14915 | 1 |
| O | 0.85085 | 0.96924 | 0.55241 | 1 |
| O | 0.80241 | 0.71924 | 0.89915 | 1 |
| O | 0.14915 | 0.46924 | 0.94759 | 1 |
| O | 0.19759 | 0.21924 | 0.60085 | 1 |
| O | 0.85085 | 0.03076 | 0.94759 | 1 |
| O | 0.80241 | 0.28076 | 0.60085 | 1 |
| O | 0.14915 | 0.53076 | 0.55241 | 1 |
| O | 0.19759 | 0.78076 | 0.89915 | 1 |
| O | 0.60085 | 0.69759 | 0.78076 | 1 |
| O | 0.55241 | 0.35085 | 0.03076 | 1 |
| O | 0.89915 | 0.30241 | 0.28076 | 1 |
| O | 0.94759 | 0.64915 | 0.53076 | 1 |
| O | 0.60085 | 0.30241 | 0.71924 | 1 |
| O | 0.55241 | 0.64915 | 0.46924 | 1 |
| O | 0.89915 | 0.69759 | 0.21924 | 1 |
| O | 0.94759 | 0.35085 | 0.96924 | 1 |
| O | 0.78076 | 0.60085 | 0.69759 | 1 |
| O | 0.03076 | 0.55241 | 0.35085 | 1 |
| O | 0.28076 | 0.89915 | 0.30241 | 1 |
| O | 0.53076 | 0.94759 | 0.64915 | 1 |
| O | 0.71924 | 0.60085 | 0.30241 | 1 |
| O | 0.46924 | 0.55241 | 0.64915 | 1 |
| O | 0.21924 | 0.89915 | 0.69759 | 1 |
| O | 0.96924 | 0.94759 | 0.35085 | 1 |
| O | 0.64915 | 0.53076 | 0.94759 | 1 |
| O | 0.69759 | 0.78076 | 0.60085 | 1 |
| O | 0.35085 | 0.03076 | 0.55241 | 1 |
| O | 0.30241 | 0.28076 | 0.89915 | 1 |
| O | 0.64915 | 0.46924 | 0.55241 | 1 |
| O | 0.69759 | 0.21924 | 0.89915 | 1 |
| O | 0.35085 | 0.96924 | 0.94759 | 1 |

|   |         |         |         |   |
|---|---------|---------|---------|---|
| O | 0.30241 | 0.71924 | 0.60085 | 1 |
| O | 0.39915 | 0.30241 | 0.21924 | 1 |
| O | 0.44759 | 0.64915 | 0.96924 | 1 |
| O | 0.10085 | 0.69759 | 0.71924 | 1 |
| O | 0.05241 | 0.35085 | 0.46924 | 1 |
| O | 0.39915 | 0.69759 | 0.28076 | 1 |
| O | 0.44759 | 0.35085 | 0.53076 | 1 |
| O | 0.10085 | 0.30241 | 0.78076 | 1 |
| O | 0.05241 | 0.64915 | 0.03076 | 1 |
| O | 0.21924 | 0.39915 | 0.30241 | 1 |
| O | 0.96924 | 0.44759 | 0.64915 | 1 |
| O | 0.71924 | 0.10085 | 0.69759 | 1 |
| O | 0.46924 | 0.05241 | 0.35085 | 1 |
| O | 0.28076 | 0.39915 | 0.69759 | 1 |
| O | 0.53076 | 0.44759 | 0.35085 | 1 |
| O | 0.78076 | 0.10085 | 0.30241 | 1 |
| O | 0.03076 | 0.05241 | 0.64915 | 1 |
| O | 0.35085 | 0.46924 | 0.05241 | 1 |
| O | 0.30241 | 0.21924 | 0.39915 | 1 |
| O | 0.64915 | 0.96924 | 0.44759 | 1 |
| O | 0.69759 | 0.71924 | 0.10085 | 1 |
| O | 0.35085 | 0.53076 | 0.44759 | 1 |
| O | 0.30241 | 0.78076 | 0.10085 | 1 |
| O | 0.64915 | 0.03076 | 0.05241 | 1 |
| O | 0.69759 | 0.28076 | 0.39915 | 1 |

**Table S6.** Fitting data of Nyquist plots under different measuring temperatures.  $R_g$  and  $R_{gb}$  represent the grain and grain boundary impedance, respectively.

| Composition | Temperature | Diameter<br>(cm) | Thickness<br>(cm) | Area<br>(cm <sup>2</sup> ) | $R_b$<br>( $\Omega$ ) | $R_{gb}$<br>( $\Omega$ ) | Conductivity<br>(S/cm) |
|-------------|-------------|------------------|-------------------|----------------------------|-----------------------|--------------------------|------------------------|
| LLZTO       | 25          | 1.034            | 0.088             | 0.840                      | 365.5                 | 153.2                    | $1.73 \times 10^{-4}$  |
|             | 40          |                  |                   |                            | 346.6                 | 89.23                    | $2.06 \times 10^{-4}$  |
|             | 60          |                  |                   |                            | 220.5                 | 34.69                    | $3.52 \times 10^{-4}$  |
|             | 80          |                  |                   |                            | 169.4                 | 11.13                    | $4.98 \times 10^{-4}$  |
| LLZNO       | 25          | 1.043            | 0.077             | 0.854                      | 257.7                 | 173.9                    | $2.09 \times 10^{-4}$  |
|             | 40          |                  |                   |                            | 185.6                 | 102.6                    | $3.13 \times 10^{-4}$  |
|             | 60          |                  |                   |                            | 128.7                 | 41.54                    | $5.30 \times 10^{-4}$  |
|             | 80          |                  |                   |                            | 70.81                 | 5.58                     | $1.18 \times 10^{-3}$  |
| LLZTNO      | 25          | 1.050            | 0.073             | 0.866                      | 338.6                 | 88.47                    | $1.97 \times 10^{-4}$  |
|             | 40          |                  |                   |                            | 236.8                 | 22.04                    | $3.26 \times 10^{-4}$  |
|             | 60          |                  |                   |                            | 141.3                 | 10.94                    | $5.54 \times 10^{-4}$  |
|             | 80          |                  |                   |                            | 76.53                 | 6.399                    | $1.02 \times 10^{-3}$  |
| LLZTNYO     | 25          | 1.038            | 0.08              | 0.846                      | 342.2                 | 164.4                    | $1.87 \times 10^{-4}$  |
|             | 40          |                  |                   |                            | 257.6                 | 86.84                    | $2.75 \times 10^{-4}$  |
|             | 60          |                  |                   |                            | 181                   | 41.69                    | $4.25 \times 10^{-4}$  |
|             | 80          |                  |                   |                            | 119.2                 | 14.58                    | $7.07 \times 10^{-4}$  |

**Table S7.** Fitting data of Nyquist plots from Day 1 to Day 30.

| Sample  | Day | Diameter (cm) | Thickness (cm) | Area (cm <sup>2</sup> ) | R <sub>b</sub> (Ω) | R <sub>gb</sub> (Ω) | Conductivity (S/cm)     |
|---------|-----|---------------|----------------|-------------------------|--------------------|---------------------|-------------------------|
| LLZTO   | 1   | 1.034         | 0.088          | 0.84                    | 365.5              | 153.2               | 1.73×10 <sup>-4</sup>   |
|         | 3   |               |                |                         | 313.4              | 169.4               | 2.17×10 <sup>-4</sup>   |
|         | 5   |               |                |                         | 340.5              | 141.5               | 2.17×10 <sup>-4</sup>   |
|         | 10  |               |                |                         | 316.5              | 253                 | 1.84×10 <sup>-4</sup>   |
|         | 15  |               |                |                         | 322.3              | 307.3               | 1.66×10 <sup>-4</sup>   |
|         | 20  |               |                |                         | 290.5              | 502.8               | 1.32×10 <sup>-4</sup>   |
|         | 30  |               |                |                         | 309.1              | 648.6               | 1.09 × 10 <sup>-4</sup> |
| LLZNO   | 1   | 1.043         | 0.077          | 0.854                   | 257.7              | 173.9               | 2.09×10 <sup>-4</sup>   |
|         | 3   |               |                |                         | 257.1              | 311.6               | 1.59×10 <sup>-4</sup>   |
|         | 5   |               |                |                         | 256.5              | 365.6               | 1.45×10 <sup>-4</sup>   |
|         | 10  |               |                |                         | 302.8              | 486                 | 1.14×10 <sup>-4</sup>   |
|         | 15  |               |                |                         | 280.5              | 646.7               | 9.72×10 <sup>-5</sup>   |
|         | 20  |               |                |                         | 288.9              | 847                 | 7.93×10 <sup>-5</sup>   |
|         | 30  |               |                |                         | 288.9              | 847                 | 7.93 × 10 <sup>-5</sup> |
| LLZTNO  | 1   | 1.05          | 0.073          | 0.866                   | 338.6              | 88.47               | 1.97×10 <sup>-4</sup>   |
|         | 3   |               |                |                         | 340.2              | 123.8               | 1.82×10 <sup>-4</sup>   |
|         | 5   |               |                |                         | 236.5              | 189.4               | 1.98×10 <sup>-4</sup>   |
|         | 10  |               |                |                         | 439.1              | 82.92               | 1.63×10 <sup>-4</sup>   |
|         | 15  |               |                |                         | 451.9              | 145.6               | 1.41×10 <sup>-4</sup>   |
|         | 20  |               |                |                         | 456.8              | 191.8               | 1.30×10 <sup>-4</sup>   |
|         | 30  |               |                |                         | 453                | 214.3               | 1.26×10 <sup>-4</sup>   |
| LLZTNYO | 1   | 1.038         | 0.08           | 0.846                   | 342.2              | 164.4               | 1.87×10 <sup>-4</sup>   |
|         | 3   |               |                |                         | 308                | 164.9               | 2×10 <sup>-4</sup>      |
|         | 5   |               |                |                         | 315.2              | 160.2               | 1.99×10 <sup>-4</sup>   |
|         | 10  |               |                |                         | 248                | 131.9               | 2.49×10 <sup>-4</sup>   |
|         | 15  |               |                |                         | 247.3              | 166.6               | 2.28×10 <sup>-4</sup>   |
|         | 20  |               |                |                         | 208.5              | 198.5               | 2.32×10 <sup>-4</sup>   |
|         | 30  |               |                |                         | 209.8              | 189.3               | 2.37×10 <sup>-4</sup>   |

**Table S8** Reaction energy of different percentage of Lithium-Hydrogen exchange (LHX)

| LLZO                 |                                     | LLZTNYO              |                                     |
|----------------------|-------------------------------------|----------------------|-------------------------------------|
| Reaction energy (eV) | Li <sup>+</sup> /H <sup>+</sup> (%) | Reaction energy (eV) | Li <sup>+</sup> /H <sup>+</sup> (%) |
| -1.957               | 1.786                               | -1.934               | 1.852                               |
| -9.840               | 8.929                               | -9.861               | 9.259                               |
| -23.508              | 21.429                              | -23.439              | 23.077                              |
| -39.434              | 35.714                              | -39.168              | 38.462                              |
| -55.280              | 50                                  | -51.258              | 50                                  |

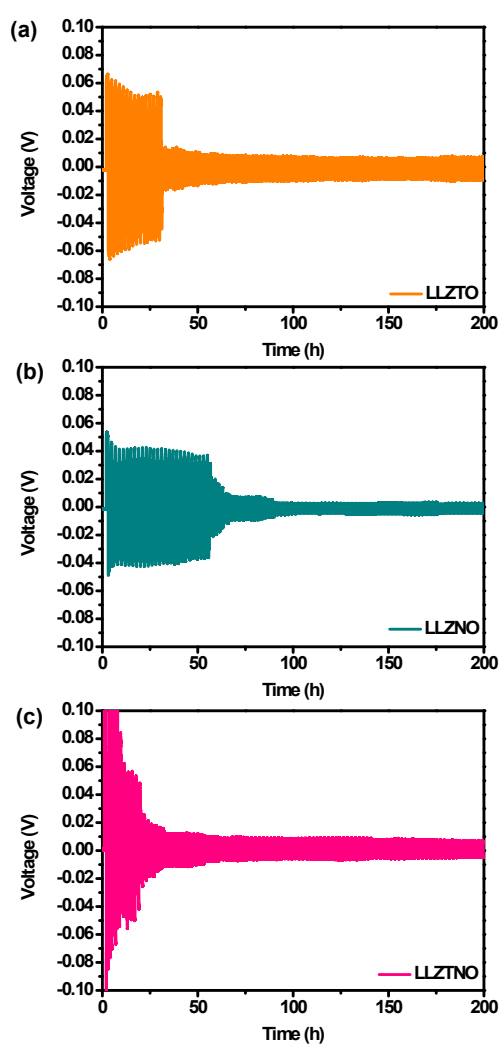**Figure S6** Galvanostatic cycling test of (a) LLZTO, (b) LLZNO, and (c) LLZTNO (lithium plating or stripping was set to 1 h).

## Reference:

1. Y. Li, Z. Wang, Y. Cao, F. Du, C. Chen, Z. Cui, X. Guo, *Electrochimica Acta*, 180 (2015) 37-42.
2. Y. Li, J.-T. Han, C.-A. Wang, H. Xie, J.B. Goodenough, *Journal of Materials Chemistry*, 22 (2012) 15357-15361.
3. Y. Ji, C. Zhou, F. Lin, B. Li, F. Yang, H. Zhu, J. Duan, Z. Chen, *Materials*, 13 (2020).
4. C. Deviannapoorani, L. Dhivya, S. Ramakumar, R. Murugan, *Journal of Power Sources*, 240 (2013) 18-25.
5. J. Gai, E. Zhao, F. Ma, D. Sun, X. Ma, Y. Jin, Q. Wu, Y. Cui, *Journal of the European Ceramic Society*, 38 (2018) 1673-1678.
6. Z. Cao, Y. Li, J. Su, J. Zhao, Y. Li, S. Yan, Q. Liu, T. He, H. Zhang, G.-R. Li, *Ionics*, 27 (2021) 1861-1870.
7. Z. Fu, J. Ferguson, *Journal of the American Ceramic Society*, 105 (2022) 6175-6183.
8. C.-H. Kuo, A.-Y. Wang, H.-Y. Liu, S.-C. Huang, X.-R. Chen, C.-C. Chi, Y.-C. Chang, M.-Y. Lu, H.-Y. Chen, *APL Materials*, 10 (2022) 121104.
9. M.P. O'Callaghan, E.J. Cussen, *Chem. Commun.*, (2007) 2048-2050.
10. C. Ma, E. Rangasamy, C. Liang, J. Sakamoto, K.L. More, M. Chi, *Angewandte Chemie International Edition*, 54 (2015) 129-133.
11. R. Jalem, M.J.D. Rushton, W. Manalastas, Jr., M. Nakayama, T. Kasuga, J.A. Kilner, R.W. Grimes, *Chemistry of Materials*, 27 (2015) 2821-2831.
